# Supplementary material
Source: HighWire-hosted journal article supplement (http://rc.rcjournal.com/highwire/filestream/16359/field_highwire_adjunct_files/0/suppl_1.pdf)
Supplement: suppl_1.pdf [file suppl_1.pdf]

**Appendix1 Supplementary material: Variables registered by healthcare professional.**

|                                                                               |                                  |                              |                                      |
|-------------------------------------------------------------------------------|----------------------------------|------------------------------|--------------------------------------|
| Nurse initials:                                                               |                                  |                              |                                      |
| DATE:                                                                         | TIME:                            |                              |                                      |
| DRUG:                                                                         | Hypertonic saline                | Salbutamol                   | Epinephrine                          |
| Analgesia:                                                                    | No analgesia                     | Sucrose                      | Acetaminophen Others                 |
| Time after eating: ____ h ____ min                                            |                                  |                              |                                      |
| Heart rate:<br>____ beats/min                                                 | Breathing frequency:<br>____ bpm | Oxygen saturation:<br>____ % | Fraction of inspired oxygen:<br>____ |
| Nebulizer                                                                     | JN                               | NHF Flow ____ L/min          | T <sup>a</sup> ____ °C               |
| <b>COMFORT-B Scale</b>                                                        |                                  |                              |                                      |
| Alertness                                                                     | ____ points                      | Physical movement            | ____ points                          |
| Calmness-Agitation                                                            | ____ points                      | Muscle tone                  | ____ points                          |
| Crying                                                                        | ____ points                      | Facial tension               | ____ points                          |
| <b>VAS (Visual Analogue Scale)</b>                                            |                                  |                              |                                      |
| Put a mark on the line below to indicate the comfort you think the child has. |                                  |                              |                                      |
| No comfort I-----I Extreme comfort                                            |                                  |                              |                                      |
| VAS Score (0 No comfort – 10 Extreme comfort): ____ points                    |                                  |                              |                                      |
| <b>SATISFACTION / NRS (Numeric rating scale)</b>                              |                                  |                              |                                      |
| NRS (0 = no pain and 4 = worst imaginable pain): ____ points                  |                                  |                              |                                      |

NHF, nebulization system integrated in High-Flow nasal cannula; JN, jet nebulizer.

This table was registered in 3 moments, before, during and after nebulization.

Caregivers registered a similar table with Comfort-B Scale, VAS and NRS.
